# Supplementary material for: Detection of lesions in the optic nerve with magnetic resonance imaging using a 3D convolutional neural network
Source: PubMed Central journal article supplement — Neuroimage Clin. 2022 Sep 13;36:103187. doi: 10.1016/j.nicl.2022.103187 (PMC9486565; doi:10.1016/j.nicl.2022.103187), 2022-09-13
Supplement: mmc1.pdf [file mmc1.pdf]

# Supplementary Material

---

---

## 1. Hyperparameter search tables

### 1.1. Neural Network

| Parameter              | Values                              |
|------------------------|-------------------------------------|
| Batch Normalization    | True, <b>False</b>                  |
| Dropout                | <b>0.1</b> , 0.25, 0.4              |
| Learning Rate          | 0.001, 0.0001, <b>3e-4</b>          |
| Filters per CONV layer | [16,32], [32,64], [ <b>64,128</b> ] |
| Dense layer filters    | 64, 128, <b>256</b>                 |

Table 1: Hyperparameter grid searched during training of the 3D convolutional neural network described in the paper. All combinations were tested using the same training procedure. Final selected parameters are highlighted in bold.

### 1.2. RF

| Parameter                 | Values                |
|---------------------------|-----------------------|
| Criterion                 | gini, <b>entropy</b>  |
| Max. features             | <b>auto</b> , log2    |
| Min. samples for leaf     | 2, 4, <b>8</b> , 20   |
| Min. samples for split    | 0.5, <b>2</b> , 5, 10 |
| N <sup>o</sup> estimators | 100, <b>200</b>       |

Table 2: Hyperparameter grid searched during training of the RF model. Parameters names are taken from the implementation in the scikit-learn library, and we refer the reader to the documentation of the library for extended information on the parameters. All combinations were tested using the same training procedure. Final selected parameters are highlighted in bold.

### 1.3. SVM

| Parameter     | Values                       |
|---------------|------------------------------|
| <b>Kernel</b> | linear, <b>rbf</b> , sigmoid |
| <b>C</b>      | 0.1,1, <b>10</b>             |
| <b>gamma</b>  | scale, <b>auto</b>           |

Table 3: Hyperparameter grid searched during training of the SVM model. Parameters names are taken from the implementation in the scikit-learn library, and we refer the reader to the documentation of the library for extended information on the parameters. All combinations were tested using the same training procedure. Final selected parameters are highlighted in bold.
